# Supplementary material
Source: publisher site journal article supplement (https://www.dovepress.com/article/467950)
Supplement: Supplementary file 1 [file get_supplementary_file.php]

**Table S1. Results of difference analysis between the two groups.**

| Accession | Description | CK1 | CK2 | CK3 | D1 | D2 | D3 | FC D/CK | P value |
| --- | --- | --- | --- | --- | --- | --- | --- | --- | --- |
| A0A5C2GA41 | IGH + IGL c62_light_IGKV2-30_IGKJ1 (Fragment) OS=Homo sapiens OX=9606 PE=2 SV=1 | 1.376 | 1.334 | 1.301 | 0.533 | 0.348 | 1.108 | 0.495886313 | 0.042711692 |
| A0A5C2GHN8 | IG c1189_heavy_IGHV4-34_IGHD3-10_IGHJ5 (Fragment) OS=Homo sapiens OX=9606 PE=2 SV=1 | 1.14 | 1.422 | 1.421 | 0.845 | 0.584 | 0.589 | 0.506653276 | 0.006785825 |
| B4DUM3 | cDNA FLJ51315, highly similar to Sarcoplasmic reticulum histidine-richcalcium-binding protein (Fragment) OS=Homo sapiens OX=9606 PE=2 SV=1 | 1.14 | 1.575 | 1.24 | 0.596 | 0.566 | 0.882 | 0.516814159 | 0.018378787 |
| Q6N095 | Uncharacterized protein OS=Homo sapiens OX=9606 GN=DKFZp686K03196 PE=1 SV=1 | 1.174 | 1.61 | 1.084 | 0.952 | 0.516 | 0.664 | 0.551189245 | 0.048903613 |
| H3BRQ4 | LIM zinc-binding domain-containing protein (Fragment) OS=Homo sapiens OX=9606 PE=1 SV=1 | 1.197 | 1.471 | 1.2 | 0.72 | 0.669 | 0.743 | 0.551189245 | 0.003455213 |
| A0A5C2GRW8 | IG c111_light_IGKV3-11_IGKJ2 (Fragment) OS=Homo sapiens OX=9606 PE=2 SV=1 | 1.05 | 1.176 | 1.639 | 0.811 | 0.798 | 0.527 | 0.552652005 | 0.045973164 |
| A0A5C2GT39 | IG c1660_heavy_IGHV4-34_IGHD5-5_IGHJ6 (Fragment) OS=Homo sapiens OX=9606 PE=2 SV=1 | 1.206 | 1.484 | 1.164 | 0.654 | 0.639 | 0.854 | 0.55708355 | 0.009560585 |
| S6BGE0 | IgG H chain OS=Homo sapiens OX=9606 PE=2 SV=1 | 1.132 | 1.435 | 1.255 | 0.984 | 0.508 | 0.685 | 0.56959707 | 0.028974617 |
| A0A5C2FX14 | IGL c680_light_IGKV1-39_IGKJ2 (Fragment) OS=Homo sapiens OX=9606 PE=2 SV=1 | 1.15 | 1.147 | 1.489 | 0.91 | 0.468 | 0.836 | 0.584786054 | 0.041994608 |
| H3BN14 | Calretinin (Fragment) OS=Homo sapiens OX=9606 GN=CALB2 PE=1 SV=2 | 1.102 | 1.174 | 1.496 | 0.791 | 0.646 | 0.791 | 0.590668081 | 0.016870014 |
| D3YTG3 | Target of Nesh-SH3 OS=Homo sapiens OX=9606 GN=ABI3BP PE=1 SV=1 | 1.485 | 1.325 | 0.951 | 0.6 | 0.843 | 0.796 | 0.595320394 | 0.044050192 |
| A0A5C2FYB4 | IGL c257_light_IGKV1-5_IGKJ2 (Fragment) OS=Homo sapiens OX=9606 PE=2 SV=1 | 1.167 | 1.275 | 1.317 | 0.788 | 0.803 | 0.65 | 0.596169194 | 0.001563431 |
| A0N5G5 | Rheumatoid factor D5 light chain (Fragment) OS=Homo sapiens OX=9606 GN=V-kappa-3 PE=2 SV=1 | 1.116 | 1.361 | 1.247 | 0.97 | 0.701 | 0.606 | 0.611439313 | 0.020634448 |
| A0A5C2GAC5 | IGH + IGL c72_heavy_IGHV3-23_IGHD5-24_IGHJ5 (Fragment) OS=Homo sapiens OX=9606 PE=2 SV=1 | 1.119 | 1.175 | 1.4 | 0.861 | 0.562 | 0.883 | 0.62425555 | 0.026299116 |
| I7JB59 | ABCG2 protein OS=Homo sapiens OX=9606 GN=ABCG2 PE=4 SV=1 | 1.13 | 1.211 | 1.307 | 0.888 | 0.677 | 0.787 | 0.644736842 | 0.005579645 |
| P51888 | Prolargin OS=Homo sapiens OX=9606 GN=PRELP PE=1 SV=1 | 1.09 | 1.484 | 1.072 | 0.732 | 0.792 | 0.829 | 0.645364783 | 0.034933334 |
| Q7Z351 | Uncharacterized protein DKFZp686N02209 OS=Homo sapiens OX=9606 GN=DKFZp686N02209 PE=2 SV=1 | 1.089 | 1.155 | 1.38 | 0.967 | 0.615 | 0.793 | 0.655353201 | 0.036366029 |
| Q6GPG7 | LPAR1 protein OS=Homo sapiens OX=9606 GN=LPAR1 PE=1 SV=1 | 1.074 | 1.089 | 1.442 | 0.942 | 0.729 | 0.724 | 0.664355062 | 0.045039454 |
| A0A024R8K7 | Integrin beta OS=Homo sapiens OX=9606 GN=ITGB4 PE=3 SV=1 | 1.209 | 1.226 | 1.169 | 0.98 | 0.535 | 0.881 | 0.66481687 | 0.041476649 |
| A0A140VK07 | Testicular secretory protein Li 7 OS=Homo sapiens OX=9606 PE=2 SV=1 | 1.175 | 1.279 | 1.148 | 0.989 | 0.673 | 0.737 | 0.666018878 | 0.01843975 |
| A0A5C2GWH5 | IG c1273_light_IGLV2-23_IGLJ3 (Fragment) OS=Homo sapiens OX=9606 PE=2 SV=1 | 1.05 | 1.19 | 1.36 | 0.968 | 0.813 | 0.619 | 0.666666667 | 0.041434644 |
| E7ENE7 | Cytochrome P450 2D6 OS=Homo sapiens OX=9606 GN=CYP2D6 PE=1 SV=3 | 1.127 | 1.207 | 1.264 | 0.895 | 0.742 | 0.765 | 0.667593107 | 0.003013359 |
| Q13753 | Laminin subunit gamma-2 OS=Homo sapiens OX=9606 GN=LAMC2 PE=1 SV=2 | 1.166 | 1.029 | 1.394 | 0.796 | 0.703 | 0.913 | 0.672053497 | 0.032871867 |
| E9LUX2 | Hemoglobin alpha-2 chain variant (Fragment) OS=Homo sapiens OX=9606 GN=HBA2 PE=3 SV=1 | 1.074 | 1.187 | 1.326 | 0.755 | 0.714 | 0.943 | 0.672428213 | 0.018104812 |
| P07585 | Decorin OS=Homo sapiens OX=9606 GN=DCN PE=1 SV=1 | 1.055 | 1.463 | 1.068 | 0.816 | 0.749 | 0.849 | 0.673173452 | 0.046399547 |
| A0A087WYF8 | PDZ and LIM domain protein 3 OS=Homo sapiens OX=9606 GN=PDLIM3 PE=1 SV=2 | 1.205 | 1.142 | 1.219 | 0.829 | 0.67 | 0.936 | 0.682837914 | 0.009556979 |
| Q7Z7G8 | Vacuolar protein sorting-associated protein 13B OS=Homo sapiens OX=9606 GN=VPS13B PE=1 SV=2 | 1.286 | 1.307 | 0.958 | 0.813 | 0.705 | 0.931 | 0.689664883 | 0.048068629 |
| Q07507 | Dermatopontin OS=Homo sapiens OX=9606 GN=DPT PE=1 SV=2 | 1.077 | 1.402 | 1.071 | 0.847 | 0.856 | 0.746 | 0.689859155 | 0.033080221 |
| F5H5I5 | ATP-binding cassette sub-family B member 9 (Fragment) OS=Homo sapiens OX=9606 GN=ABCB9 PE=4 SV=1 | 1.167 | 1.248 | 1.134 | 0.742 | 0.985 | 0.724 | 0.690617075 | 0.015676134 |
| P21926 | CD9 antigen OS=Homo sapiens OX=9606 GN=CD9 PE=1 SV=4 | 1.114 | 1.214 | 1.21 | 0.783 | 0.788 | 0.891 | 0.695873375 | 0.001719268 |
| Q96PE1 | Adhesion G protein-coupled receptor A2 OS=Homo sapiens OX=9606 GN=ADGRA2 PE=1 SV=2 | 1.087 | 1.256 | 1.19 | 0.83 | 0.766 | 0.872 | 0.698556468 | 0.003616478 |
| C9JEE0 | Immunoglobulin lambda-like polypeptide 1 (Fragment) OS=Homo sapiens OX=9606 GN=IGLL1 PE=1 SV=1 | 1.133 | 1.174 | 1.203 | 0.919 | 0.68 | 0.891 | 0.709401709 | 0.01213514 |
| B2R582 | cDNA, FLJ92374, highly similar to Homo sapiens C-type lectin domain family 3, member B (CLEC3B), mRNA OS=Homo sapiens OX=9606 PE=2 SV=1 | 1.112 | 1.325 | 1.061 | 0.949 | 0.768 | 0.784 | 0.714979989 | 0.028760321 |
| P11177 | Pyruvate dehydrogenase E1 component subunit beta, mitochondrial OS=Homo sapiens OX=9606 GN=PDHB PE=1 SV=3 | 1.285 | 1.062 | 1.145 | 0.92 | 0.772 | 0.815 | 0.71792669 | 0.0139052 |
| Q9NRV9 | Heme-binding protein 1 OS=Homo sapiens OX=9606 GN=HEBP1 PE=1 SV=1 | 1.276 | 1.155 | 1.058 | 0.898 | 0.91 | 0.703 | 0.719690456 | 0.023998509 |
| A0A5C2G0Y5 | IGL c2958_light_IGKV3-20_IGKJ5 (Fragment) OS=Homo sapiens OX=9606 PE=2 SV=1 | 1.102 | 1.131 | 1.254 | 1.018 | 0.838 | 0.658 | 0.720963579 | 0.04649941 |
| E9PEJ4 | Acetyltransferase component of pyruvate dehydrogenase complex OS=Homo sapiens OX=9606 GN=DLAT PE=1 SV=1 | 1.265 | 1.118 | 1.103 | 0.921 | 0.795 | 0.798 | 0.721170396 | 0.008114783 |
| P02511 | Alpha-crystallin B chain OS=Homo sapiens OX=9606 GN=CRYAB PE=1 SV=2 | 1.076 | 1.201 | 1.2 | 0.844 | 0.874 | 0.804 | 0.725337935 | 0.002323606 |
| F2Z2A2 | Major facilitator superfamily domain-containing protein 9 OS=Homo sapiens OX=9606 GN=MFSD9 PE=1 SV=1 | 1.29 | 0.994 | 1.192 | 0.803 | 0.89 | 0.832 | 0.726409666 | 0.025040747 |
| Q96FC7 | Phytanoyl-CoA hydroxylase-interacting protein-like OS=Homo sapiens OX=9606 GN=PHYHIPL PE=1 SV=3 | 1.006 | 1.177 | 1.28 | 0.714 | 0.978 | 0.844 | 0.732313023 | 0.048894624 |
| A0A5C2GMT3 | IG c1332_heavy_IGHV3-21_IGHD2-2_IGHJ6 (Fragment) OS=Homo sapiens OX=9606 PE=2 SV=1 | 1.001 | 1.242 | 1.221 | 0.792 | 0.762 | 0.983 | 0.7323903 | 0.040617923 |
| A0A5C2GCZ0 | IGL c453_light_IGKV3-15_IGKJ5 (Fragment) OS=Homo sapiens OX=9606 PE=2 SV=1 | 1.061 | 1.207 | 1.191 | 1.003 | 0.796 | 0.743 | 0.734894478 | 0.029125559 |
| Q6QAJ8 | Transmembrane protein 220 OS=Homo sapiens OX=9606 GN=TMEM220 PE=2 SV=1 | 1.258 | 1.098 | 1.101 | 0.934 | 0.738 | 0.871 | 0.735608909 | 0.017669026 |
| P08559 | Pyruvate dehydrogenase E1 component subunit alpha, somatic form, mitochondrial OS=Homo sapiens OX=9606 GN=PDHA1 PE=1 SV=3 | 1.265 | 1.066 | 1.121 | 0.92 | 0.78 | 0.849 | 0.738412514 | 0.013774462 |
| E1U340 | ZNF511/PRAP1 fusion protein OS=Homo sapiens OX=9606 PE=2 SV=1 | 1.071 | 1.259 | 1.107 | 0.8 | 0.794 | 0.969 | 0.745708467 | 0.02309409 |
| B7Z737 | cDNA FLJ52784, highly similar to Bcl-2-like 13 protein OS=Homo sapiens OX=9606 PE=2 SV=1 | 1.145 | 1.269 | 1.022 | 0.94 | 0.774 | 0.851 | 0.746507567 | 0.027821201 |
| P55899 | IgG receptor FcRn large subunit p51 OS=Homo sapiens OX=9606 GN=FCGRT PE=1 SV=1 | 1.132 | 1.217 | 1.085 | 0.691 | 0.96 | 0.916 | 0.747524752 | 0.034606483 |
| Q9UIG8 | Solute carrier organic anion transporter family member 3A1 OS=Homo sapiens OX=9606 GN=SLCO3A1 PE=1 SV=3 | 1.146 | 1.132 | 1.152 | 0.907 | 0.775 | 0.888 | 0.749271137 | 0.002329774 |
| Q86UU0 | B-cell CLL/lymphoma 9-like protein OS=Homo sapiens OX=9606 GN=BCL9L PE=1 SV=1 | 1.035 | 1.277 | 1.118 | 0.767 | 0.857 | 0.946 | 0.749271137 | 0.030947351 |
| A0A024RCT9 | High mobility group AT-hook 1, isoform CRA_b OS=Homo sapiens OX=9606 GN=HMGA1 PE=4 SV=1 | 1.273 | 1.118 | 1.035 | 0.91 | 0.834 | 0.831 | 0.751605371 | 0.018879601 |
| Q16363 | Laminin subunit alpha-4 OS=Homo sapiens OX=9606 GN=LAMA4 PE=1 SV=4 | 1.055 | 1.236 | 1.13 | 0.879 | 0.863 | 0.837 | 0.753873137 | 0.006489528 |
| Q9BZQ8 | Protein Niban 1 OS=Homo sapiens OX=9606 GN=NIBAN1 PE=1 SV=1 | 1.063 | 1.188 | 1.159 | 0.844 | 0.922 | 0.823 | 0.759237537 | 0.004787928 |
| B7Z442 | cDNA FLJ56100, highly similar to Cytochrome P450 4F2 OS=Homo sapiens OX=9606 PE=2 SV=1 | 1.182 | 1.138 | 1.078 | 0.844 | 0.833 | 0.925 | 0.765744556 | 0.003164178 |
| B7ZW00 | COL6A3 protein OS=Homo sapiens OX=9606 GN=COL6A3 PE=2 SV=1 | 1.063 | 1.185 | 1.143 | 0.878 | 0.848 | 0.883 | 0.769389561 | 0.002231421 |
| Q69YM0 | Uncharacterized protein DKFZp762F1313 (Fragment) OS=Homo sapiens OX=9606 GN=DKFZp762F1313 PE=2 SV=1 | 1.205 | 1.056 | 1.125 | 0.968 | 0.831 | 0.815 | 0.772002363 | 0.016599627 |
| Q13976 | cGMP-dependent protein kinase 1 OS=Homo sapiens OX=9606 GN=PRKG1 PE=1 SV=3 | 1.034 | 1.216 | 1.134 | 0.907 | 0.812 | 0.898 | 0.773345154 | 0.013574774 |
| A0A5C2G6W1 | IGL c164_light_IGKV1-5_IGKJ1 (Fragment) OS=Homo sapiens OX=9606 PE=2 SV=1 | 1.015 | 1.155 | 1.202 | 0.929 | 0.859 | 0.84 | 0.779359431 | 0.016428745 |
| Q53RS1 | Uncharacterized protein ADAM17 (Fragment) OS=Homo sapiens OX=9606 GN=ADAM17 PE=4 SV=1 | 1.153 | 1.198 | 1.02 | 0.831 | 0.812 | 0.985 | 0.779590626 | 0.031779209 |
| Q7Z7K0 | COX assembly mitochondrial protein homolog OS=Homo sapiens OX=9606 GN=CMC1 PE=1 SV=1 | 1.15 | 1.127 | 1.09 | 0.834 | 0.78 | 1.019 | 0.782001782 | 0.030315152 |
| Q9ULC3 | Ras-related protein Rab-23 OS=Homo sapiens OX=9606 GN=RAB23 PE=1 SV=1 | 1.095 | 1.152 | 1.117 | 0.863 | 0.837 | 0.936 | 0.783590963 | 0.002030006 |
| K7EPT8 | Glial fibrillary acidic protein (Fragment) OS=Homo sapiens OX=9606 GN=GFAP PE=1 SV=2 | 1.02 | 1.221 | 1.117 | 0.931 | 0.929 | 0.782 | 0.786777844 | 0.035075255 |
| B7Z6N1 | cDNA FLJ54385, highly similar to ETS domain-containing transcription factor ERF OS=Homo sapiens OX=9606 PE=2 SV=1 | 1.032 | 1.086 | 1.232 | 0.87 | 0.869 | 0.911 | 0.791044776 | 0.019016732 |
| Q53FR6 | Cartilage oligomeric matrix protein variant (Fragment) OS=Homo sapiens OX=9606 PE=2 SV=1 | 1.171 | 1.186 | 0.986 | 0.976 | 0.808 | 0.873 | 0.794795094 | 0.047339117 |
| P10632 | Cytochrome P450 2C8 OS=Homo sapiens OX=9606 GN=CYP2C8 PE=1 SV=2 | 1.216 | 1.045 | 1.076 | 0.815 | 0.919 | 0.929 | 0.798022176 | 0.024655186 |
| O00330 | Pyruvate dehydrogenase protein X component, mitochondrial OS=Homo sapiens OX=9606 GN=PDHX PE=1 SV=3 | 1.234 | 1.032 | 1.071 | 0.911 | 0.926 | 0.827 | 0.798321846 | 0.0314962 |
| O00212 | Rho-related GTP-binding protein RhoD OS=Homo sapiens OX=9606 GN=RHOD PE=1 SV=2 | 1.202 | 1.155 | 0.978 | 0.924 | 0.882 | 0.859 | 0.79910045 | 0.034370117 |
| A0A1B0GTK8 | Tumor necrosis factor alpha-induced protein 8-like protein 3 OS=Homo sapiens OX=9606 GN=TNFAIP8L3 PE=1 SV=1 | 1.013 | 1.143 | 1.175 | 0.936 | 0.829 | 0.904 | 0.801260883 | 0.019914785 |
| I3L0N7 | Serine/arginine repetitive matrix protein 2 (Fragment) OS=Homo sapiens OX=9606 GN=SRRM2 PE=1 SV=1 | 1.055 | 1.153 | 1.122 | 0.926 | 0.939 | 0.804 | 0.801501502 | 0.013136502 |
| A0A1S5UZ29 | Kalirin OS=Homo sapiens OX=9606 GN=KALRN PE=2 SV=1 | 1.079 | 1.161 | 1.089 | 0.904 | 0.908 | 0.859 | 0.802343046 | 0.001916135 |
| Q9H4G4 | Golgi-associated plant pathogenesis-related protein 1 OS=Homo sapiens OX=9606 GN=GLIPR2 PE=1 SV=3 | 1.01 | 1.087 | 1.229 | 0.895 | 0.903 | 0.876 | 0.803968731 | 0.028245726 |
| D3DVC4 | Nestin, isoform CRA_c OS=Homo sapiens OX=9606 GN=NES PE=3 SV=1 | 0.983 | 1.213 | 1.126 | 0.894 | 0.892 | 0.893 | 0.806441902 | 0.033007884 |
| C9JYJ6 | Filamin A-interacting protein 1-like (Fragment) OS=Homo sapiens OX=9606 GN=FILIP1L PE=1 SV=1 | 1.055 | 1.107 | 1.158 | 0.874 | 0.98 | 0.824 | 0.806626506 | 0.017429215 |
| Q9NW82 | WD repeat-containing protein 70 OS=Homo sapiens OX=9606 GN=WDR70 PE=1 SV=1 | 1.065 | 1.175 | 1.077 | 0.956 | 0.805 | 0.922 | 0.808863431 | 0.02127984 |
| Q08AD1 | Calmodulin-regulated spectrin-associated protein 2 OS=Homo sapiens OX=9606 GN=CAMSAP2 PE=1 SV=3 | 1.172 | 1.011 | 1.133 | 0.894 | 0.836 | 0.954 | 0.809408926 | 0.023694491 |
| B4DXB6 | cDNA FLJ58335, highly similar to GPI transamidase component PIG-U OS=Homo sapiens OX=9606 PE=2 SV=1 | 1.052 | 1.15 | 1.107 | 0.908 | 0.876 | 0.907 | 0.813236627 | 0.002427975 |
| P12109 | Collagen alpha-1(VI) chain OS=Homo sapiens OX=9606 GN=COL6A1 PE=1 SV=3 | 1.01 | 1.16 | 1.138 | 0.938 | 0.852 | 0.902 | 0.813784764 | 0.01792799 |
| Q9BTL3 | RNA guanine-N7 methyltransferase activating subunit OS=Homo sapiens OX=9606 GN=RAMAC PE=1 SV=1 | 1.146 | 1.087 | 1.071 | 0.918 | 0.813 | 0.965 | 0.81598063 | 0.015835911 |
| A7BI36 | p180/ribosome receptor OS=Homo sapiens OX=9606 GN=RRBP1 PE=2 SV=2 | 1.034 | 1.165 | 1.103 | 0.879 | 0.958 | 0.86 | 0.81677771 | 0.01396007 |
| E5RHU4 | Bridging integrator 3 OS=Homo sapiens OX=9606 GN=BIN3 PE=1 SV=1 | 1.193 | 1.115 | 0.992 | 0.833 | 0.977 | 0.889 | 0.817878788 | 0.049633931 |
| B7Z636 | cDNA FLJ55887, highly similar to Ankyrin-2 (Fragment) OS=Homo sapiens OX=9606 PE=2 SV=1 | 1.067 | 1.053 | 1.179 | 0.949 | 0.887 | 0.864 | 0.818429827 | 0.013431387 |
| A0A1B0GVN9 | Uroporphyrinogen decarboxylase OS=Homo sapiens OX=9606 GN=UROD PE=1 SV=1 | 1.03 | 1.073 | 1.193 | 0.879 | 0.996 | 0.829 | 0.82038835 | 0.046861901 |
| H0YBL1 | Inositol-1-monophosphatase (Fragment) OS=Homo sapiens OX=9606 GN=IMPA1 PE=1 SV=1 | 1.029 | 1.185 | 1.079 | 0.963 | 0.823 | 0.92 | 0.821743091 | 0.034121587 |
| H0YIC4 | Citrate synthase (Fragment) OS=Homo sapiens OX=9606 GN=CS PE=1 SV=1 | 1.175 | 1.042 | 1.076 | 0.817 | 0.947 | 0.943 | 0.822046766 | 0.028743507 |
| Q9BQA1 | Methylosome protein 50 OS=Homo sapiens OX=9606 GN=WDR77 PE=1 SV=1 | 1.001 | 1.12 | 1.17 | 0.907 | 0.943 | 0.859 | 0.823154057 | 0.025308028 |
| Q8N5J2 | Ubiquitin carboxyl-terminal hydrolase MINDY-1 OS=Homo sapiens OX=9606 GN=MINDY1 PE=1 SV=2 | 1.161 | 1.13 | 0.997 | 0.912 | 0.854 | 0.944 | 0.824209246 | 0.027450402 |
| Q96KC8 | DnaJ homolog subfamily C member 1 OS=Homo sapiens OX=9606 GN=DNAJC1 PE=1 SV=1 | 1.09 | 1.032 | 1.167 | 0.903 | 0.871 | 0.937 | 0.824262694 | 0.011426067 |
| D3DNU8 | Kininogen 1, isoform CRA_a OS=Homo sapiens OX=9606 GN=KNG1 PE=4 SV=1 | 1.119 | 1.035 | 1.136 | 0.837 | 0.96 | 0.915 | 0.824316109 | 0.015506354 |
| P50579 | Methionine aminopeptidase 2 OS=Homo sapiens OX=9606 GN=METAP2 PE=1 SV=1 | 1.02 | 1.157 | 1.111 | 0.836 | 0.994 | 0.883 | 0.825121655 | 0.036103634 |
| A0A590UJT9 | Phosphatidylinositol 4-phosphate 5-kinase type-1 beta OS=Homo sapiens OX=9606 GN=PIP5K1B PE=4 SV=1 | 1.101 | 1.148 | 1.035 | 0.949 | 0.901 | 0.866 | 0.827040195 | 0.009611137 |
| Q52LD8 | Raftlin-2 OS=Homo sapiens OX=9606 GN=RFTN2 PE=2 SV=3 | 1.119 | 1.065 | 1.095 | 1.031 | 0.868 | 0.822 | 0.829826167 | 0.046475116 |
| Q86T03 | Type 1 phosphatidylinositol 4,5-bisphosphate 4-phosphatase OS=Homo sapiens OX=9606 GN=PIP4P1 PE=1 SV=1 | 0.923 | 0.905 | 0.897 | 1.023 | 1.206 | 1.047 | 1.202201835 | 0.033845273 |
| Q8NE22 | SET domain-containing protein 9 OS=Homo sapiens OX=9606 GN=SETD9 PE=2 SV=2 | 0.854 | 0.933 | 0.936 | 1.134 | 1.036 | 1.107 | 1.203452075 | 0.009637466 |
| A0A1L5BXV2 | Receptor expression-enhancing protein OS=Homo sapiens OX=9606 GN=REEP6 PE=2 SV=1 | 0.866 | 0.838 | 1.018 | 1.07 | 1.08 | 1.128 | 1.204261572 | 0.03430101 |
| Q9Y315 | Deoxyribose-phosphate aldolase OS=Homo sapiens OX=9606 GN=DERA PE=1 SV=2 | 0.853 | 0.871 | 0.995 | 1.067 | 1.175 | 1.04 | 1.20706142 | 0.03664696 |
| P42765 | 3-ketoacyl-CoA thiolase, mitochondrial OS=Homo sapiens OX=9606 GN=ACAA2 PE=1 SV=2 | 0.953 | 0.853 | 0.91 | 1.161 | 1.15 | 0.972 | 1.208762887 | 0.049331218 |
| B7Z341 | cDNA FLJ54521, highly similar to Protein NDRG3 OS=Homo sapiens OX=9606 PE=2 SV=1 | 0.936 | 0.957 | 0.822 | 1.141 | 1.056 | 1.088 | 1.209944751 | 0.017540186 |
| Q99720 | Sigma non-opioid intracellular receptor 1 OS=Homo sapiens OX=9606 GN=SIGMAR1 PE=1 SV=1 | 0.969 | 0.845 | 0.899 | 1.073 | 1.174 | 1.04 | 1.211573903 | 0.02390789 |
| A0A059RQV9 | ATP synthase protein 8 OS=Homo sapiens OX=9606 GN=ATP8 PE=3 SV=1 | 0.916 | 0.874 | 0.92 | 1.091 | 1.085 | 1.114 | 1.21402214 | 0.000353818 |
| Q6JQN1 | Acyl-CoA dehydrogenase family member 10 OS=Homo sapiens OX=9606 GN=ACAD10 PE=1 SV=1 | 0.918 | 0.911 | 0.881 | 1.059 | 1.118 | 1.113 | 1.21402214 | 0.000930458 |
| Q96IX5 | ATP synthase membrane subunit DAPIT, mitochondrial OS=Homo sapiens OX=9606 GN=ATP5MD PE=1 SV=1 | 0.994 | 0.811 | 0.899 | 1.082 | 1.137 | 1.078 | 1.219304734 | 0.024462693 |
| B3KTT6 | cDNA FLJ38699 fis, clone KIDNE2002168, highly similar to Short chain 3-hydroxyacyl-CoA dehydrogenase, mitochondrial OS=Homo sapiens OX=9606 PE=2 SV=1 | 0.883 | 0.967 | 0.844 | 1.087 | 1.135 | 1.083 | 1.226800297 | 0.006992995 |
| P50747 | Biotin--protein ligase OS=Homo sapiens OX=9606 GN=HLCS PE=1 SV=1 | 0.975 | 0.947 | 0.769 | 1.17 | 1.09 | 1.049 | 1.229654404 | 0.048951992 |
| Q8TD22 | Sideroflexin-5 OS=Homo sapiens OX=9606 GN=SFXN5 PE=1 SV=1 | 0.839 | 0.891 | 0.96 | 1.077 | 1.139 | 1.094 | 1.230483271 | 0.006447615 |
| A0A384MDW7 | Enoyl Coenzyme A hydratase, short chain, 1, mitochondrial OS=Homo sapiens OX=9606 GN=ECHS1 PE=2 SV=1 | 0.924 | 0.89 | 0.872 | 1.152 | 1.091 | 1.072 | 1.234177215 | 0.001829228 |
| O43772 | Mitochondrial carnitine/acylcarnitine carrier protein OS=Homo sapiens OX=9606 GN=SLC25A20 PE=1 SV=1 | 0.935 | 0.835 | 0.912 | 1.217 | 0.99 | 1.112 | 1.237509321 | 0.042393833 |
| Q6AWC2 | Protein WWC2 OS=Homo sapiens OX=9606 GN=WWC2 PE=1 SV=2 | 0.971 | 0.832 | 0.878 | 1.221 | 1.025 | 1.073 | 1.237970906 | 0.04141947 |
| Q53ET4 | Serine hydroxymethyltransferase (Fragment) OS=Homo sapiens OX=9606 PE=2 SV=1 | 0.943 | 0.836 | 0.897 | 1.231 | 1.087 | 1.007 | 1.242526158 | 0.040572532 |
| Q9H0W9 | Ester hydrolase C11orf54 OS=Homo sapiens OX=9606 GN=C11orf54 PE=1 SV=1 | 0.76 | 0.896 | 1.009 | 1.111 | 1.093 | 1.131 | 1.251407129 | 0.037395889 |
| P31512 | Dimethylaniline monooxygenase [N-oxide-forming] 4 OS=Homo sapiens OX=9606 GN=FMO4 PE=1 SV=3 | 0.958 | 0.822 | 0.878 | 1.031 | 1.113 | 1.198 | 1.257336343 | 0.02158918 |
| Q96BW5 | Phosphotriesterase-related protein OS=Homo sapiens OX=9606 GN=PTER PE=1 SV=1 | 0.793 | 0.932 | 0.932 | 1.105 | 1.224 | 1.014 | 1.258185924 | 0.040285183 |
| B7Z927 | cDNA FLJ51460, highly similar to Protein-L-isoaspartate O-methyltransferase domain-containing protein 1 OS=Homo sapiens OX=9606 PE=2 SV=1 | 0.914 | 0.819 | 0.89 | 1.164 | 1.201 | 1.012 | 1.28745711 | 0.017572614 |
| P31937 | 3-hydroxyisobutyrate dehydrogenase, mitochondrial OS=Homo sapiens OX=9606 GN=HIBADH PE=1 SV=2 | 0.858 | 0.936 | 0.827 | 1.192 | 1.125 | 1.062 | 1.289202594 | 0.007011759 |
| A0A096LPI6 | Utp12 domain-containing protein (Fragment) OS=Homo sapiens OX=9606 PE=4 SV=2 | 0.848 | 0.968 | 0.8 | 1.185 | 1.149 | 1.05 | 1.293577982 | 0.016320404 |
| P19623 | Spermidine synthase OS=Homo sapiens OX=9606 GN=SRM PE=1 SV=1 | 0.874 | 0.948 | 0.794 | 1.026 | 1.153 | 1.205 | 1.293577982 | 0.020951948 |
| B4DRH6 | cDNA FLJ54509, highly similar to Trifunctional enzyme subunit alpha, mitochondrial OS=Homo sapiens OX=9606 PE=2 SV=1 | 0.917 | 0.781 | 0.915 | 1.18 | 1.138 | 1.071 | 1.296976655 | 0.00932917 |
| Q16715 | Pyruvate kinase (Fragment) OS=Homo sapiens OX=9606 PE=3 SV=1 | 0.909 | 0.906 | 0.784 | 1.189 | 0.987 | 1.225 | 1.308580223 | 0.034359465 |
| Q9Y4R8 | Telomere length regulation protein TEL2 homolog OS=Homo sapiens OX=9606 GN=TELO2 PE=1 SV=2 | 0.839 | 0.84 | 0.919 | 0.966 | 1.227 | 1.209 | 1.309468822 | 0.038501708 |
| P31327 | Carbamoyl-phosphate synthase [ammonia], mitochondrial OS=Homo sapiens OX=9606 GN=CPS1 PE=1 SV=2 | 1.007 | 0.886 | 0.694 | 1.197 | 1.128 | 1.089 | 1.3196753 | 0.046005612 |
| Q68CJ6 | Nuclear GTPase SLIP-GC OS=Homo sapiens OX=9606 GN=NUGGC PE=2 SV=3 | 0.916 | 0.739 | 0.93 | 1.213 | 1.021 | 1.18 | 1.320696325 | 0.031787926 |
| P55084 | Trifunctional enzyme subunit beta, mitochondrial OS=Homo sapiens OX=9606 GN=HADHB PE=1 SV=3 | 0.844 | 0.762 | 0.976 | 1.138 | 1.234 | 1.046 | 1.323780015 | 0.02800439 |
| P05062 | Fructose-bisphosphate aldolase B OS=Homo sapiens OX=9606 GN=ALDOB PE=1 SV=2 | 0.988 | 0.802 | 0.79 | 1.137 | 1.053 | 1.229 | 1.325193798 | 0.026806235 |
| P16989 | Y-box-binding protein 3 OS=Homo sapiens OX=9606 GN=YBX3 PE=1 SV=4 | 0.819 | 0.745 | 1.012 | 1.162 | 1.221 | 1.041 | 1.329192547 | 0.041698407 |
| Q8WV93 | AFG1-like ATPase OS=Homo sapiens OX=9606 GN=AFG1L PE=1 SV=2 | 0.909 | 0.927 | 0.737 | 1.043 | 1.118 | 1.266 | 1.331908278 | 0.03319046 |
| P30085 | UMP-CMP kinase OS=Homo sapiens OX=9606 GN=CMPK1 PE=1 SV=3 | 0.817 | 0.991 | 0.765 | 1.132 | 1.038 | 1.257 | 1.331908278 | 0.037911808 |
| Q96GK7 | Fumarylacetoacetate hydrolase domain-containing protein 2A OS=Homo sapiens OX=9606 GN=FAHD2A PE=1 SV=1 | 0.741 | 0.921 | 0.894 | 1.275 | 1.022 | 1.147 | 1.34741784 | 0.032426902 |
| O95848 | Uridine diphosphate glucose pyrophosphatase NUDT14 OS=Homo sapiens OX=9606 GN=NUDT14 PE=1 SV=2 | 0.861 | 0.804 | 0.883 | 1.332 | 1.121 | 1 | 1.355180534 | 0.039084661 |
| Q6P6B1 | Glutamate-rich protein 5 OS=Homo sapiens OX=9606 GN=ERICH5 PE=2 SV=1 | 0.8 | 0.841 | 0.887 | 1.006 | 1.341 | 1.126 | 1.373813291 | 0.035742108 |
| A6ND36 | Protein FAM83G OS=Homo sapiens OX=9606 GN=FAM83G PE=1 SV=2 | 0.913 | 0.732 | 0.846 | 1.301 | 1.077 | 1.132 | 1.409072662 | 0.016589498 |
| Q9UKV0 | Histone deacetylase 9 OS=Homo sapiens OX=9606 GN=HDAC9 PE=1 SV=2 | 0.827 | 0.839 | 0.751 | 1.014 | 1.249 | 1.32 | 1.482416218 | 0.015755867 |
| Q9BVM4 | Gamma-glutamylaminecyclotransferase OS=Homo sapiens OX=9606 GN=GGACT PE=1 SV=2 | 0.767 | 0.949 | 0.677 | 1.14 | 1.418 | 1.049 | 1.507312996 | 0.04164743 |
| Q7Z5P4 | 17-beta-hydroxysteroid dehydrogenase 13 OS=Homo sapiens OX=9606 GN=HSD17B13 PE=1 SV=1 | 0.964 | 0.695 | 0.657 | 1.06 | 1.412 | 1.212 | 1.590673575 | 0.03147226 |
| Q9NUV7 | Serine palmitoyltransferase 3 OS=Homo sapiens OX=9606 GN=SPTLC3 PE=1 SV=3 | 0.938 | 0.619 | 0.721 | 1.242 | 1.16 | 1.321 | 1.634328358 | 0.010100048 |
| E9PJ88 | Nuclear pore complex-interacting protein family member A5 OS=Homo sapiens OX=9606 GN=NPIPA5 PE=4 SV=1 | 0.835 | 0.691 | 0.684 | 1.067 | 1.292 | 1.432 | 1.715384615 | 0.010835075 |
| Q9UI32 | Glutaminase liver isoform, mitochondrial OS=Homo sapiens OX=9606 GN=GLS2 PE=1 SV=2 | 0.893 | 0.727 | 0.522 | 1.491 | 1.116 | 1.25 | 1.800653595 | 0.020381001 |
| O43704 | Sulfotransferase family cytosolic 1B member 1 OS=Homo sapiens OX=9606 GN=SULT1B1 PE=1 SV=2 | 0.503 | 0.723 | 0.862 | 1.529 | 1.31 | 1.073 | 1.873563218 | 0.02242109 |
| A0A140VKF9 | Testis tissue sperm-binding protein Li 76m OS=Homo sapiens OX=9606 PE=2 SV=1 | 0.556 | 0.796 | 0.68 | 1.289 | 1.13 | 1.549 | 1.952755906 | 0.010060922 |
| Q53GN4 | WD repeat domain 1, isoform CRA_a (Fragment) OS=Homo sapiens OX=9606 GN=WDR1 PE=2 SV=1 | 0.764 | 0.756 | 0.503 | 1.281 | 1.404 | 1.292 | 1.965892239 | 0.002302598 |
| Q9UH92 | Max-like protein X OS=Homo sapiens OX=9606 GN=MLX PE=1 SV=2 | 0.514 | 0.501 | 0.926 | 1.224 | 1.571 | 1.263 | 2.09067491 | 0.016472241 |
| P11509 | Cytochrome P450 2A6 OS=Homo sapiens OX=9606 GN=CYP2A6 PE=1 SV=4 | 0.275 | 0.648 | 0.942 | 1.715 | 1.139 | 1.279 | 2.216085791 | 0.043523985 |
| Q53F91 | Villin 1 variant (Fragment) OS=Homo sapiens OX=9606 PE=2 SV=1 | 0.306 | 0.663 | 0.731 | 1.379 | 1.864 | 1.056 | 2.528823529 | 0.032362267 |

**Table S2. The results of the GO enrichment analysis.**

| id | num | ratio | class | ID | Pvalue | Qvalue |
| --- | --- | --- | --- | --- | --- | --- |
| GO:1904469 positive regulation of tumor necrosis factor secretion | 21 | 0.077 | Biological Process | GO:1904469 | 0.000000033 | 0.000367428 |
| GO:1904467 regulation of tumor necrosis factor secretion | 21 | 0.073 | Biological Process | GO:1904467 | 0.000000100 | 0.000559959 |
| GO:1990774 tumor necrosis factor secretion | 21 | 0.07 | Biological Process | GO:1990774 | 0.000000190 | 0.000705822 |
| GO:0014002 astrocyte development | 30 | 0.049 | Biological Process | GO:0014002 | 0.000000811 | 0.002039933 |
| GO:0046789 host cell surface receptor binding | 39 | 0.043 | Molecular Function | GO:0046789 | 0.000000971 | 0.001052683 |
| GO:0019064 fusion of virus membrane with host plasma membrane | 46 | 0.038 | Biological Process | GO:0019064 | 0.000001068 | 0.002039933 |
| GO:0046812 host cell surface binding | 39 | 0.042 | Molecular Function | GO:0046812 | 0.000001086 | 0.001052683 |
| GO:0044273 sulfur compound catabolic process | 25 | 0.055 | Biological Process | GO:0044273 | 0.000001096 | 0.002039933 |
| GO:0004618 phosphoglycerate kinase activity | 15 | 0.085 | Molecular Function | GO:0004618 | 0.000001382 | 0.001052683 |
| GO:0042910 xenobiotic transporter activity | 16 | 0.079 | Molecular Function | GO:0042910 | 0.000001602 | 0.001052683 |

**Table S3. The results of the KEGG enrichment analysis.**

| Pathway | out (66) | All (3619) | Pvalue | Qvalue | Pathway ID |
| --- | --- | --- | --- | --- | --- |
| Fatty acid elongation | 5 | 17 | 0.000009045 | 0.001221122 | ko00062 |
| PI3K-Akt signaling pathway | 14 | 221 | 0.000029881 | 0.001755712 | ko04151 |
| African trypanosomiasis | 9 | 97 | 0.000051404 | 0.001755712 | ko05143 |
| Carbon metabolism | 10 | 121 | 0.000052021 | 0.001755712 | ko01200 |
| Primary immunodeficiency | 8 | 81 | 0.000089111 | 0.002406003 | ko05340 |
| Valine, leucine and isoleucine degradation | 6 | 52 | 0.000308174 | 0.006607054 | ko00280 |
| ECM-receptor interaction | 6 | 53 | 0.000342588 | 0.006607054 | ko04512 |
| Amoebiasis | 9 | 128 | 0.000438290 | 0.007396151 | ko05146 |
| Fatty acid metabolism | 5 | 41 | 0.000780919 | 0.011713782 | ko01212 |
| Dilated cardiomyopathy (DCM) | 8 | 113 | 0.000893343 | 0.012060136 | ko05414 |

**Table S4. Histoimmunohistochemical results of 57 samples.**

| **ID** | **Semi quantitative evaluation** | | | | **quantitative analysis（The average IOD of positive signal /μm²）** | | | | | |
| --- | --- | --- | --- | --- | --- | --- | --- | --- | --- | --- |
| **Scope** | **Intensity** | **Score** | **Rate** | **Field 1** | **Field 2** | **Field 3** | **Field 4** | **Field 5** | **Average** |
| **1001** | 3 | 2 | 6 | + | 244.6 | 259.6 | 240.6 | 262.5 | 267.5 | 254.96 |
| **1002** | 4 | 2 | 8 | + | 312.5 | 314.7 | 322 | 307 | 310.5 | 313.34 |
| **1003** | 3 | 3 | 9 | ++ | 590.3 | 647.2 | 581 | 640.8 | 599.5 | 611.76 |
| **1004** | 3 | 2 | 6 | + | 255.7 | 235 | 254.7 | 230.9 | 252.4 | 245.74 |
| **1005** | 3 | 2 | 6 | + | 225.7 | 229.6 | 239.1 | 204.9 | 225.8 | 225.02 |
| **1006** | 3 | 2 | 6 | + | 324.6 | 315.1 | 297.1 | 322.7 | 329.5 | 317.8 |
| **1007** | 2 | 2 | 4 | + | 117.4 | 107.4 | 120.9 | 127.5 | 125.2 | 119.68 |
| **1008** | 2 | 2 | 4 | + | 170.4 | 155.9 | 170 | 166.9 | 165.3 | 165.7 |
| **1009** | 2 | 1 | 2 | - | 53.8 | 56.9 | 57.4 | 48.6 | 50.4 | 53.42 |
| **1011** | 3 | 2 | 6 | + | 202.8 | 208.9 | 199.5 | 207.8 | 189.3 | 201.66 |
| **1012** | 2 | 2 | 4 | + | 98.4 | 103.7 | 95.2 | 102.7 | 89.7 | 97.94 |
| **1013** | 2 | 2 | 4 | + | 81.1 | 81.1 | 75.1 | 86.4 | 80.7 | 80.88 |
| **1014** | 3 | 2 | 6 | + | 218.4 | 213.1 | 232.6 | 232.4 | 199.2 | 219.14 |
| **1015** | 2 | 2 | 4 | + | 122.7 | 128.2 | 117.3 | 117.2 | 115 | 120.08 |
| **1016** | 2 | 2 | 4 | + | 97.2 | 102.1 | 98.1 | 99.2 | 99.8 | 99.28 |
| **1017** | 2 | 2 | 4 | + | 61.8 | 58.3 | 58.6 | 56.7 | 65.9 | 60.26 |
| **1018** | 2 | 1 | 2 | - | 33 | 33.2 | 29.8 | 35.6 | 30.2 | 32.36 |
| **1019** | 2 | 1 | 2 | - | 39.9 | 42.7 | 39.1 | 42 | 39.4 | 40.62 |
| **1020** | 3 | 3 | 9 | ++ | 556.6 | 509.5 | 564.4 | 532.8 | 550.6 | 542.78 |
| **1021** | 2 | 2 | 4 | + | 171.1 | 169.6 | 168.3 | 186 | 178.7 | 174.74 |
| **1022** | 4 | 1 | 4 | + | 146.2 | 136.7 | 146.3 | 143.4 | 136.1 | 141.74 |
| **1024** | 3 | 2 | 6 | + | 79.4 | 76.8 | 76.1 | 72 | 71.8 | 75.22 |
| **1025** | 3 | 2 | 6 | + | 274.3 | 270.9 | 257.7 | 278.5 | 292.5 | 274.78 |
| **1026** | 2 | 2 | 4 | + | 47 | 44 | 44.4 | 48.1 | 44.3 | 45.56 |
| **1027** | 2 | 2 | 4 | + | 230.7 | 239.8 | 226.4 | 242.1 | 251.7 | 238.14 |
| **1028** | 2 | 2 | 4 | + | 43.7 | 46 | 40.9 | 44.8 | 46.3 | 44.34 |
| **1029** | 3 | 3 | 9 | ++ | 405.3 | 432.4 | 402.5 | 395.6 | 406.4 | 408.44 |
| **1030** | 3 | 3 | 9 | ++ | 629.6 | 652.8 | 602.2 | 659.9 | 607.1 | 630.32 |
| **1031** | 4 | 3 | 12 | +++ | 1215 | 1119.1 | 1097.6 | 1217.9 | 1296.9 | 1189.3 |
| **1032** | 3 | 2 | 6 | + | 611.4 | 656 | 566.3 | 662 | 637.8 | 626.7 |
| **1033** | 3 | 3 | 9 | ++ | 306.5 | 329.5 | 314.4 | 301.5 | 320.9 | 314.56 |
| **1034** | 3 | 2 | 6 | + | 139.3 | 147.7 | 143.3 | 149.7 | 149.1 | 145.82 |
| **1035** | 3 | 3 | 9 | ++ | 421.3 | 431 | 458.5 | 380.6 | 447.3 | 427.74 |
| **1036** | 2 | 2 | 4 | + | 62.8 | 62.8 | 59.4 | 60.2 | 60.9 | 61.22 |
| **1037** | 2 | 2 | 4 | + | 145.5 | 155.3 | 143.2 | 145.3 | 153.2 | 148.5 |
| **1038** | 3 | 3 | 9 | ++ | 808.7 | 787.9 | 739.9 | 793.6 | 737.1 | 773.44 |
| **1039** | 3 | 2 | 6 | + | 106.3 | 110.7 | 100.3 | 96 | 107.2 | 104.1 |
| **1040** | 2 | 1 | 2 | - | 37.5 | 36.1 | 35.3 | 37.6 | 34.5 | 36.2 |
| **1041** | 4 | 1 | 4 | + | 72.4 | 72.2 | 72.5 | 77.4 | 68.7 | 72.64 |
| **1042** | 2 | 1 | 2 | - | 57.8 | 54.4 | 52.9 | 53.5 | 58.9 | 55.5 |
| **1043** | 4 | 1 | 4 | + | 91.6 | 90.6 | 92.4 | 86.7 | 88.2 | 89.9 |
| **1044** | 4 | 1 | 4 | + | 44.2 | 47.5 | 41.9 | 43.2 | 41.9 | 43.74 |
| **1045** | 3 | 2 | 6 | + | 107.3 | 103.4 | 98.9 | 97.6 | 102.3 | 101.9 |
| **1046** | 2 | 2 | 4 | + | 56.7 | 55.5 | 53.3 | 54 | 53.1 | 54.52 |
| **1047** | 3 | 2 | 6 | + | 93.2 | 100.2 | 99.4 | 95 | 91.6 | 95.88 |
| **1048** | 3 | 2 | 6 | + | 115.8 | 126.6 | 109.1 | 112.2 | 118.3 | 116.4 |
| **1049** | 2 | 2 | 4 | + | 75.8 | 82.4 | 74.2 | 68.7 | 74.4 | 75.1 |
| **1050** | 4 | 2 | 8 | + | 170.7 | 154.9 | 184.8 | 180.3 | 160.6 | 170.26 |
| **1051** | 3 | 2 | 6 | + | 85.1 | 77.8 | 87.3 | 90.7 | 80.8 | 84.34 |
| **1052** | 4 | 2 | 8 | + | 197.7 | 195.7 | 200.1 | 203.5 | 211.5 | 201.7 |
| **1053** | 4 | 2 | 8 | + | 270.1 | 296.1 | 261.4 | 293.9 | 253.3 | 274.96 |
| **1054** | 4 | 2 | 8 | + | 452.7 | 418.2 | 410.7 | 483.1 | 418.5 | 436.64 |
| **1055** | 3 | 2 | 6 | + | 126.1 | 115 | 116.9 | 136.7 | 138.5 | 126.64 |
| **1057** | 3 | 3 | 9 | ++ | 187.5 | 201 | 174.3 | 184.8 | 168.9 | 183.3 |
| **1058** | 3 | 3 | 9 | ++ | 40.1 | 36.3 | 37.4 | 44.1 | 42.3 | 40.04 |
| **1059** | 3 | 3 | 9 | ++ | 44.9 | 45.8 | 40.7 | 47 | 48.9 | 45.46 |
| **1060** | 3 | 3 | 9 | ++ | 129 | 124.9 | 133.9 | 139.8 | 137.4 | 133 |

**Table S5 Diabetes Condition of Patients.**

| **Table S7 Diabetes Condition of Patients** | |
| --- | --- |
| 1001 | Patients with Diabetes or percent of HbA1c>6.5% |
| 1002 | Patients with Diabetes or percent of HbA1c>6.5% |
| 1003 | Patients with Diabetes or percent of HbA1c>6.5% |
| 1004 | Patients without Diabetes and percent of HbA1c<6.5% |
| 1005 | Patients with Diabetes or percent of HbA1c>6.5% |
| 1006 | Patients with Diabetes or percent of HbA1c>6.5% |
| 1007 | Patients with Diabetes or percent of HbA1c>6.5% |
| 1008 | Patients with Diabetes or percent of HbA1c>6.5% |
| 1009 | Patients without Diabetes and percent of HbA1c<6.5% |
| 1011 | Patients with Diabetes or percent of HbA1c>6.5% |
| 1012 | Patients with Diabetes or percent of HbA1c>6.5% |
| 1013 | Patients with Diabetes or percent of HbA1c>6.5% |
| 1014 | Patients without Diabetes and percent of HbA1c<6.5% |
| 1015 | Patients without Diabetes and percent of HbA1c<6.5% |
| 1016 | Patients with Diabetes or percent of HbA1c>6.5% |
| 1017 | Patients without Diabetes and percent of HbA1c<6.5% |
| 1018 | Patients with Diabetes or percent of HbA1c>6.5% |
| 1019 | Patients with Diabetes or percent of HbA1c>6.5% |
| 1020 | Patients without Diabetes and percent of HbA1c<6.5% |
| 1021 | Patients with Diabetes or percent of HbA1c>6.5% |
| 1022 | Patients without Diabetes and percent of HbA1c<6.5% |
| 1024 | Patients with Diabetes or percent of HbA1c>6.5% |
| 1025 | Patients without Diabetes and percent of HbA1c<6.5% |
| 1026 | Patients without Diabetes and percent of HbA1c<6.5% |
| 1027 | Patients without Diabetes and percent of HbA1c<6.5% |
| 1028 | Patients with Diabetes or percent of HbA1c>6.5% |
| 1029 | Patients with Diabetes or percent of HbA1c>6.5% |
| 1030 | Patients with Diabetes or percent of HbA1c>6.5% |
| 1031 | Patients with Diabetes or percent of HbA1c>6.5% |
| 1032 | Patients with Diabetes or percent of HbA1c>6.5% |
| 1033 | Patients with Diabetes or percent of HbA1c>6.5% |
| 1034 | Patients with Diabetes or percent of HbA1c>6.5% |
| 1035 | Patients with Diabetes or percent of HbA1c>6.5% |
| 1036 | Patients with Diabetes or percent of HbA1c>6.5% |
| 1037 | Patients without Diabetes and percent of HbA1c<6.5% |
| 1038 | Patients with Diabetes or percent of HbA1c>6.5% |
| 1039 | Patients without Diabetes and percent of HbA1c<6.5% |
| 1041 | Patients without Diabetes and percent of HbA1c<6.5% |
| 1042 | Patients without Diabetes and percent of HbA1c<6.5% |
| 1043 | Patients with Diabetes or percent of HbA1c>6.5% |
| 1044 | Patients with Diabetes or percent of HbA1c>6.5% |
| 1045 | Patients without Diabetes and percent of HbA1c<6.5% |
| 1046 | Patients without Diabetes and percent of HbA1c<6.5% |
| 1047 | Patients with Diabetes or percent of HbA1c>6.5% |
| 1048 | Patients without Diabetes and percent of HbA1c<6.5% |
| 1049 | Patients without Diabetes and percent of HbA1c<6.5% |
| 1050 | Patients with Diabetes or percent of HbA1c>6.5% |
| 1051 | Patients without Diabetes and percent of HbA1c<6.5% |
| 1053 | Patients with Diabetes or percent of HbA1c>6.5% |
| 1053 | Patients without Diabetes and percent of HbA1c<6.5% |
| 1054 | Patients with Diabetes or percent of HbA1c>6.5% |
| 1055 | Patients with Diabetes or percent of HbA1c>6.5% |
| 1057 | Patients with Diabetes or percent of HbA1c>6.5% |
| 1058 | Patients without Diabetes and percent of HbA1c<6.5% |
| 1059 | Patients without Diabetes and percent of HbA1c<6.5% |
| 1060 | Patients without Diabetes and percent of HbA1c<6.5% |
